# Supplementary material for: Evidence for πCHR→dMbonding in transition metal carbene compounds (LnMCHR) and its decisive role in the α-agostic effect
Source: Royal Society of Chemistry journal article supplement (doi:10.1039/d2cp03870f), 2022-01-01
Supplement: d2cp03870f1.pdf [file d2cp03870f1.pdf]

*Supporting Information for*

**Evidence for  $\pi_{\text{CHR}} \rightarrow d_{\text{M}}$  Bonding in Transition Metal Carbene Compounds ( $L_nM=CHR$ ) and Its Decisive Role in the  $\alpha$ -Agostic Effect**

Xuhui Lin<sup>a,\*</sup>, Weiqin Tian<sup>a</sup>, Wei Wu<sup>b,\*</sup>, Yirong Mo<sup>c,\*</sup>

<sup>a</sup> School of Life Science and Engineering, Southwest Jiaotong University, Chengdu, Sichuan 610031, China

<sup>b</sup> The State Key Laboratory of Physical Chemistry of Solid Surfaces, iChEM, Fujian Provincial Key Laboratory of Theoretical and Computational Chemistry and College of Chemistry and Chemical Engineering, Xiamen University, Xiamen, Fujian 361005, China

<sup>c</sup> Department of Nanoscience, Joint School of Nanoscience and Nanoengineering, University of North Carolina at Greensboro, Greensboro, NC 27401, United States

E-mail: [xuhui.lin@swjtu.edu.cn](mailto:xuhui.lin@swjtu.edu.cn) (XL); [weiwu@xmu.edu.cn](mailto:weiwu@xmu.edu.cn) (WW); [y\\_mo3@uncg.edu](mailto:y_mo3@uncg.edu) (YM).

## Methodology

**Block-localized wavefunction (BLW) method.** Most popular computational approaches for bonding analyses are MO-based and either project out localized orbitals from delocalized canonical MOs or build a molecular wave function from its fragmental canonical molecular orbitals (MOs), or partition molecular electron densities to atomic or fragmental parts based on certain criteria. These top-down approaches are essentially post-SCF methods as the generated local orbitals are not optimal. Alternatively, valence bond (VB) theory adopts a bottom-up approach and builds wave functions for Lewis (localized or resonance) structures with local such as atomic or fragmental orbitals, which are self-consistently optimized, and the final molecular wave function is composed of a few Lewis structures for a system with the computational algorithm similar to the MCSCF within the MO theory. The resonance energy is estimated with the energy difference between the final molecular wave function and the most stable resonance structure.

To combine the advantages of both MO and VB theories, we proposed the BLW method where a BLW represents a unique electron-localized diabatic state (usually the most stable resonance state). The fundamental assumption is that all electrons and primitive basis functions ( $\chi$ ) can be divided into  $k$  subgroups (blocks), and each MO is block-localized and expanded in only one block. Assuming that there are  $m_i$  basis functions and  $n_i$  electrons for block  $i$ , we can express block-localized MOs for this block as

$$\varphi_j^i = \sum_{\mu=1}^{m_i} c_{j\mu}^i \chi_{\mu}^i \quad (1)$$

Subsequently, the BLW for a closed-shell is defined using a Slater determinant as

$$\begin{aligned} \Psi(\text{BLW}) &= \left| (\varphi_1^1)^2 (\varphi_2^1)^2 \cdots (\varphi_{n_1/2}^1)^2 \cdots (\varphi_{n_i/2}^i)^2 \cdots (\varphi_{n_k/2}^k)^2 \right\rangle \\ &= \hat{A}[\Phi_1 \cdots \Phi_i \cdots \Phi_k] \end{aligned} \quad (2)$$

where  $\Phi_i$  is the Hartree product of all occupied block-localized MOs in block  $i$ . Orbitals in the same subspace are subject to the orthogonality constraint as in MO theory, but

orbitals from different subspaces are nonorthogonal as in VB theory. Since Eq. 6 is self-consistently optimized by minimizing its expectation energy, all local orbitals are naturally optimal. The BLW method is available at the DFT level with the geometry optimization and spectra computation capabilities.

The primary aim of this study is to provide a quantitative assessment of the magnitude of the  $\pi$  electron delocalization from the occupied CHR orbital of  $\pi$  symmetry to the low-lying vacant metal  $d$  orbital(s). To this end, we built the reference BLW state where the concerned  $d_M$  orbital remained vacant (i.e., removed from the expansion space of any occupied orbitals)

$$\Psi_{\text{BLW}}(\pi \rightarrow d_M) = \hat{A}[\varphi_{d_M}^0 \psi] \quad (3)$$

The  $\pi \rightarrow d_M$  charge transfer interaction is thus evaluated as the energy difference between the BLW state and the regular delocalized DFT states. It should be noted that  $\pi \rightarrow d_{xz}$  interaction has two origins, one coming from  $\pi_{R'} \rightarrow d_{xz}$  between ancillary ligands ( $R'$ ) and metal center, the other being concerning  $\pi_{\text{CHR}} \rightarrow d_{xz}$ .

### The xyz coordinates of all studied structures optimized at PBE0-D3 level

[VCH<sub>2</sub>]<sup>+</sup> DFT (Cs) E = -110.4673014

|   |               |              |              |
|---|---------------|--------------|--------------|
| V | 0.0000000000  | 0.0000000000 | 0.0000000000 |
| C | 0.0000000000  | 1.7116046196 | 0.0000000000 |
| H | 1.1305418716  | 1.5262344973 | 0.0000000000 |
| H | -0.3014607466 | 2.7570359930 | 0.0000000000 |

[VCH<sub>2</sub>]<sup>+</sup> DFT (C<sub>2v</sub>) E = -110.4649275

|   |               |               |               |
|---|---------------|---------------|---------------|
| V | 0.0000056292  | 0.4527291877  | -0.0000000000 |
| C | -0.0000046963 | -1.3112978182 | 0.0000000000  |
| H | 0.9300090620  | -1.8911734628 | -0.0000000000 |
| H | -0.9300099949 | -1.8911849067 | -0.0000000000 |

[VCH<sub>2</sub>]<sup>+</sup> BLW(C<sub>2v</sub>) E = -110.4563124

|   |               |              |              |
|---|---------------|--------------|--------------|
| V | 0.0000000000  | 0.0000000000 | 0.0000000000 |
| C | 0.0000000000  | 1.8067492204 | 0.0000000000 |
| H | 0.9297560805  | 2.3789089648 | 0.0000000000 |
| H | -0.9296832406 | 2.3790179983 | 0.0000000000 |

[Cl<sub>2</sub>VCHMe]<sup>-</sup> DFT E = -1070.41747

|    |               |               |               |
|----|---------------|---------------|---------------|
| V  | 0.0000000000  | 0.0000000000  | 0.0000000000  |
| C  | 0.0000000000  | 1.7206948087  | 0.0000000000  |
| H  | 1.1336378877  | 1.3644545478  | 0.0000000000  |
| C  | -0.1419538813 | 3.2003396728  | -0.0218444255 |
| H  | 0.2883053920  | 3.6801421228  | 0.8700052033  |
| H  | 0.3375955891  | 3.6562274247  | -0.9009721370 |
| H  | -1.2016619998 | 3.4718761557  | -0.0550980498 |
| CL | -0.2405230521 | -0.9775227852 | 2.0288190319  |
| CL | -0.1909603343 | -0.9785837436 | -2.0331081909 |

[Cl<sub>2</sub>VCHMe]<sup>-</sup> BLW E = -1070.394257

|    |               |               |               |
|----|---------------|---------------|---------------|
| V  | 0.0000000000  | 0.0000000000  | 0.0000000000  |
| C  | 0.0000000000  | 1.8326670309  | 0.0000000000  |
| H  | 0.9973561133  | 2.2883256426  | 0.0000000000  |
| C  | -1.1501640387 | 2.7936085555  | 0.0050360053  |
| H  | -1.1281951421 | 3.4625580755  | 0.8812782954  |
| H  | -1.1498856047 | 3.4469214112  | -0.8831895063 |
| H  | -2.1192678232 | 2.2847715756  | 0.0212269046  |
| CL | 0.0193927358  | -0.8972367596 | 2.0954194885  |
| CL | -0.0100752637 | -0.9074681090 | -2.0907582456 |

[Cl<sub>2</sub>VCHMe]<sup>+</sup> DFT E = -1070.048281

|    |               |               |               |
|----|---------------|---------------|---------------|
| V  | 0.000000000   | 0.000000000   | 0.000000000   |
| C  | 0.000000000   | 1.7831001495  | 0.000000000   |
| H  | 1.0669260122  | 2.0746691030  | 0.000000000   |
| C  | -0.9786172857 | 2.8719490659  | 0.0929446290  |
| H  | -0.7751248619 | 3.4500468428  | 1.0066701017  |
| H  | -0.8092881314 | 3.5716144295  | -0.7384884425 |
| H  | -2.0159286971 | 2.5394874592  | 0.0915777457  |
| CL | -1.8161450351 | -0.5968118546 | 0.7770217629  |
| CL | 1.8097130639  | -0.7054227978 | 0.7388243857  |

[Cl<sub>2</sub>VCHMe]<sup>+</sup> BLW E = -1069.988555

|    |               |               |               |
|----|---------------|---------------|---------------|
| V  | 0.000000000   | 0.000000000   | 0.000000000   |
| C  | 0.000000000   | 1.8282187025  | 0.000000000   |
| H  | 0.9785841082  | 2.3096729334  | 0.000000000   |
| C  | -1.1751378598 | 2.6524290090  | 0.2708511275  |
| H  | -1.0896968069 | 2.9437238914  | 1.3355357784  |
| H  | -1.1185680296 | 3.5911752735  | -0.2948749028 |
| H  | -2.1506048494 | 2.1837955385  | 0.1289500201  |
| CL | -0.8858036493 | -0.3914295267 | 1.8729309304  |
| CL | 2.1023045903  | -0.2324142812 | 0.0399309959  |

[CH<sub>2</sub>CH<sub>3</sub>Cl<sub>2</sub>VCHMe] DFT E = -1149.508867

|    |               |               |               |
|----|---------------|---------------|---------------|
| V  | 0.0657181723  | -0.0860465835 | 0.0426584538  |
| C  | -0.2988443205 | 1.5894028546  | 0.0109512500  |
| H  | 0.8416630557  | 1.5895559231  | 0.1010424628  |
| CL | 0.8752600276  | -0.5840036289 | 2.0277065686  |
| CL | 1.1409945575  | -0.5881817935 | -1.8097450910 |
| C  | -0.9724233859 | 2.8945212722  | -0.0482391119 |
| H  | -0.7738338964 | 3.4854179318  | 0.8538593488  |
| H  | -0.6311372583 | 3.4777107046  | -0.9117148003 |
| H  | -2.0533368276 | 2.7568355192  | -0.1350823758 |
| C  | -1.8371688096 | -0.5500511435 | -0.0899843536 |
| H  | -2.2914529812 | -0.1888234689 | -1.0120199859 |
| H  | -2.3891488537 | -0.2074765698 | 0.7855062350  |
| C  | -1.4872189547 | -2.0341835507 | -0.0838318583 |
| H  | -0.3978949483 | -2.2434223265 | 0.0247487934  |
| H  | -1.9359294958 | -2.5548555015 | 0.7633827325  |
| H  | -1.7571717527 | -2.5210649675 | -1.0217806569 |

[CH<sub>2</sub>CH<sub>3</sub>Cl<sub>2</sub>V-CHMe] BLWT E = -1149.468673

|    |               |               |               |
|----|---------------|---------------|---------------|
| V  | 0.1780651782  | -0.0577511910 | 0.0915729553  |
| C  | 0.1233177524  | 1.7542493706  | 0.0321140283  |
| H  | 1.1153921925  | 2.2153325373  | 0.0216728638  |
| CL | 0.9294543827  | -0.5055633254 | 2.1194112616  |
| CL | 1.1671384726  | -0.5844724152 | -1.8063622240 |
| C  | -1.0414496098 | 2.6758677703  | -0.0160665913 |
| H  | -0.9980592549 | 3.4054881570  | 0.8029070470  |
| H  | -1.0239025480 | 3.2581467491  | -0.9478853092 |
| H  | -2.0055274666 | 2.1673421265  | 0.0380047811  |
| C  | -1.7645335510 | -0.4467932340 | -0.0253824482 |
| H  | -2.2591588471 | 0.0104306611  | -0.8818332496 |
| H  | -2.2017516288 | -0.1074481180 | 0.9188789946  |
| C  | -1.5841792969 | -1.9573292982 | -0.1100418831 |
| H  | -0.7550147447 | -2.3199112230 | 0.5212591119  |
| H  | -2.4632978208 | -2.4915195286 | 0.2628225745  |
| H  | -1.3800781497 | -2.2893904384 | -1.1292452627 |

E-[Cl3V-CHMe] DFT E = -1530.480730

|    |               |               |               |
|----|---------------|---------------|---------------|
| V  | 0.0000000000  | 0.0000000000  | 0.0000000000  |
| C  | 0.0000000000  | 1.7296748229  | 0.0000000000  |
| H  | 1.1165211111  | 1.7277293979  | 0.0000000000  |
| CL | 1.0882627465  | -0.6230391185 | 1.7616297472  |
| CL | 1.0636721436  | -0.6184919042 | -1.7785259732 |
| CL | -2.0430509773 | -0.5140555849 | 0.0109148707  |
| C  | -0.7280101046 | 3.0087664617  | -0.0006087413 |
| H  | -0.4614328383 | 3.6025398624  | 0.8819263509  |
| H  | -0.4650298620 | 3.5994856044  | -0.8862706293 |
| H  | -1.8069207890 | 2.8419880789  | 0.0018300299  |

E-[Cl3V-CHMe] BLW E = -1530.426183

|    |               |               |               |
|----|---------------|---------------|---------------|
| V  | 0.0000000000  | 0.0000000000  | 0.0000000000  |
| C  | 0.0000000000  | 1.7997565191  | 0.0000000000  |
| H  | 1.0198488998  | 2.1932139013  | 0.0000000000  |
| CL | 1.0909933665  | -0.4220390520 | 1.8341302171  |
| CL | 1.0849017997  | -0.4239451183 | -1.8375034051 |
| CL | -2.1403357870 | -0.3849891934 | 0.0041897135  |
| C  | -1.1243079357 | 2.7572670791  | -0.0009018382 |
| H  | -1.0525183870 | 3.4089422674  | 0.8800663407  |
| H  | -1.0502035473 | 3.4111633383  | -0.8799762077 |
| H  | -2.1018769051 | 2.2794144575  | -0.0025449873 |

Z-[Cl3V-CHMe] DFT E = -1530.480552

|    |               |               |               |
|----|---------------|---------------|---------------|
| V  | 0.0000000000  | 0.0000000000  | 0.0000000000  |
| C  | 0.0000000000  | 1.7537688409  | 0.0000000000  |
| H  | 1.0473060236  | 2.0883357271  | 0.0000000000  |
| C  | -1.0810981451 | 2.7640326031  | 0.0251735196  |
| H  | -0.9942613602 | 3.3779493193  | 0.9304636052  |
| H  | -0.9863930348 | 3.4353896969  | -0.8372289133 |
| H  | -2.0723754149 | 2.3094006214  | 0.0070456924  |
| CL | 1.9956695853  | -0.7244684383 | -0.0910509803 |
| CL | -1.0814786776 | -0.4796198427 | 1.7959851463  |
| CL | -1.2741648215 | -0.4962778334 | -1.6531825586 |

Z-[Cl3V-CHMe] BLW E = -1530.430432

|    |               |               |               |
|----|---------------|---------------|---------------|
| V  | 0.0000000000  | 0.0000000000  | 0.0000000000  |
| C  | 0.0000000000  | 1.7952021769  | 0.0000000000  |
| H  | 0.9807603919  | 2.2669404962  | 0.0000000000  |
| C  | -1.2109900431 | 2.6306042087  | 0.0051381322  |
| H  | -1.1757918608 | 3.3151600212  | 0.8630179013  |
| H  | -1.2206726666 | 3.2523399122  | -0.9007877041 |
| H  | -2.1434065180 | 2.0660855192  | 0.0464892414  |
| CL | 2.1547013441  | -0.2733560527 | -0.0865083429 |
| CL | -0.9762484620 | -0.4394886185 | 1.8904511119  |
| CL | -1.1246749977 | -0.4248433625 | -1.8104135054 |

[C5H5Cl2V-CHMe] DFT E = -1263.760631 a.u.

|    |               |               |               |
|----|---------------|---------------|---------------|
| V  | -0.0173708256 | 0.0263880393  | 0.0066729662  |
| C  | -0.0018131041 | 1.7814898861  | 0.0005546667  |
| H  | 1.1131701358  | 1.7353992425  | 0.0197187888  |
| C  | -2.1263513630 | 0.3426477097  | 0.6818712849  |
| C  | -1.7233178500 | -0.9353228537 | 1.1240804178  |
| C  | -1.4359256251 | -1.7255372813 | -0.0101302221 |
| C  | -1.6841331997 | -0.9446379443 | -1.1599133168 |
| C  | -2.1018790242 | 0.3368688883  | -0.7422569128 |
| H  | -1.0223451302 | -2.7237816903 | 0.0010143876  |
| H  | -1.5802515967 | -1.2313756685 | 2.1519201215  |
| H  | -2.4028843529 | 1.1730700174  | 1.3135812469  |
| H  | -1.5058958241 | -1.2489553705 | -2.1798273689 |
| H  | -2.3563007978 | 1.1620268428  | -1.3899615574 |
| CL | 1.2259019220  | -0.5073192509 | 1.7804018128  |
| CL | 1.2865398051  | -0.5209442101 | -1.7184529653 |
| C  | -0.6039346492 | 3.1256902744  | -0.0142711609 |
| H  | -0.2984325261 | 3.6965032687  | 0.8715784084  |

|   |               |              |               |
|---|---------------|--------------|---------------|
| H | -0.2659591863 | 3.6917950047 | -0.8912800021 |
| H | -1.6968391871 | 3.0906708853 | -0.0343424150 |

[C5H5Cl2V-CHMe] BLW E = -1263.699816 a.u.

|    |               |               |               |
|----|---------------|---------------|---------------|
| V  | -0.0545981525 | 0.0585701497  | 0.0089051932  |
| C  | 0.0571017202  | 1.8625070123  | 0.0025006851  |
| H  | 1.1511608268  | 1.9689302873  | 0.0057120591  |
| C  | -2.1514989732 | 0.2521396372  | 0.6866726238  |
| C  | -1.8205203352 | -1.0586644641 | 1.1234239240  |
| C  | -1.6180572041 | -1.8702070262 | -0.0051008441 |
| C  | -1.7839700083 | -1.0701012682 | -1.1480971211 |
| C  | -2.1288600800 | 0.2450443659  | -0.7359332608 |
| H  | -1.3133817383 | -2.9062118506 | 0.0051259775  |
| H  | -1.7144845434 | -1.3621617864 | 2.1541233596  |
| H  | -2.4025640982 | 1.0876290180  | 1.3230900858  |
| H  | -1.6448814800 | -1.3842748572 | -2.1716247722 |
| H  | -2.3600238571 | 1.0738681641  | -1.3883646214 |
| Cl | 1.1619771713  | -0.3394389809 | 1.8573526413  |
| Cl | 1.2139764574  | -0.3480384756 | -1.8043516378 |
| C  | -0.6806720713 | 3.1341141105  | -0.0077442367 |
| H  | -0.3901997856 | 3.7286496598  | 0.8691530751  |
| H  | -0.3774527116 | 3.7225222993  | -0.8844207321 |
| H  | -1.7662118960 | 3.0278463591  | -0.0146757297 |

[OCH3Cl2V-CHMe] DFT E = -1185.449308

|    |               |               |               |
|----|---------------|---------------|---------------|
| V  | 0.6020267661  | -0.0037298729 | -0.0250561881 |
| C  | 0.0627326598  | 1.6649731484  | 0.0224513446  |
| H  | 1.0312759884  | 2.1949839226  | 0.0656192773  |
| Cl | 1.7738985370  | -0.3192115095 | 1.7888505798  |
| Cl | 1.8825955628  | -0.1852309492 | -1.7832506813 |
| C  | -1.1769409691 | 2.4710741056  | 0.0206630565  |
| H  | -1.2363489290 | 3.0873865362  | 0.9264592786  |
| H  | -1.1883929150 | 3.1577533950  | -0.8350220633 |
| H  | -2.0682575914 | 1.8426627529  | -0.0286455516 |
| O  | -0.8076751346 | -0.9142606780 | -0.0948336906 |
| C  | -1.8280289658 | -1.8717953080 | -0.1108538472 |
| H  | -1.7376737033 | -2.5126175043 | 0.7700877691  |
| H  | -2.7961254336 | -1.3645207516 | -0.0970673466 |
| H  | -1.7435504805 | -2.4752892537 | -1.0181192327 |

[OCH3Cl2V-CHMe] BLW E = -1185.392505



|    |               |               |               |
|----|---------------|---------------|---------------|
| V  | 0.2386825215  | -0.1041286336 | 0.0761185474  |
| C  | 0.1847737007  | 1.7015979085  | 0.0146906588  |
| H  | 1.1509219262  | 2.2108680529  | 0.0162106842  |
| CL | 1.0300229502  | -0.5581826236 | 2.0792311685  |
| CL | 1.4927517162  | -0.5935975252 | -1.6719049259 |
| C  | -1.0511420895 | 2.5123888526  | -0.0610037798 |
| H  | -1.1121743879 | 3.2031320918  | 0.7900551603  |
| H  | -1.0315117850 | 3.1352059489  | -0.9657974699 |
| H  | -1.9526488032 | 1.8984799360  | -0.0812330139 |
| O  | -1.5038756511 | -0.3662692837 | -0.1205587276 |
| C  | -1.6471506126 | -1.7781635026 | -0.1202194552 |
| H  | -0.6796964932 | -2.2990117471 | 0.0295938798  |
| H  | -2.3039772921 | -2.0812118523 | 0.6981115090  |
| H  | -2.0454403085 | -2.1089295890 | -1.0820115312 |

[COCl2V-CHMe] DFT E = -1183.331687

|    |               |               |               |
|----|---------------|---------------|---------------|
| V  | 0.0569860640  | -0.1393407956 | 0.0231759965  |
| C  | -0.2827202718 | 1.6107827837  | 0.2058773847  |
| H  | 0.4550434345  | 2.1207766406  | -0.4411093927 |
| CL | -0.8880060378 | -1.1855806674 | 1.5398847902  |
| CL | 1.9085951542  | -0.4866664300 | -0.8658549261 |
| C  | -1.1971997478 | 2.4707315186  | 0.9689539274  |
| H  | -0.5934957954 | 3.1080965128  | 1.6317392852  |
| H  | -1.7079669879 | 3.1622692506  | 0.2847798125  |
| H  | -1.9283989995 | 1.9226242400  | 1.5619255501  |
| C  | -1.2648108817 | -0.1983286152 | -1.5076400666 |
| O  | -2.0010644598 | -0.2299795557 | -2.3491070708 |

[COCl2V-CHMe] BLW E = -1183.259501

|    |               |               |               |
|----|---------------|---------------|---------------|
| V  | -0.0707953122 | -0.1864824348 | 0.0404061198  |
| C  | -0.0895153776 | 1.6183889363  | 0.2376794050  |
| H  | 0.8740831791  | 2.1236955865  | 0.1480023927  |
| CL | -0.1765891201 | -0.8716166965 | 2.0441598554  |
| CL | 1.7223256919  | -0.4196803345 | -1.0836491218 |
| C  | -1.2578217965 | 2.3480161650  | 0.7384249772  |
| H  | -0.9732996956 | 2.7965026366  | 1.7027745754  |
| H  | -1.4988957032 | 3.1856747900  | 0.0688212054  |
| H  | -2.1580379501 | 1.7457231739  | 0.8932423456  |
| C  | -1.5248888419 | -0.1162538677 | -1.4630038086 |
| O  | -2.2896036029 | -0.0685830724 | -2.2742326558 |

[CNCl2V-CHMe] DFT E = -1163.124431

|    |               |               |               |
|----|---------------|---------------|---------------|
| V  | -0.0184631102 | -0.0943481419 | 0.0765955237  |
| C  | -0.2674324060 | 1.6356382439  | 0.1571525943  |
| H  | 0.5579088689  | 1.9694415464  | -0.5000349736 |
| CL | -1.0245522607 | -0.9666911566 | 1.7078749673  |
| CL | 1.9813729982  | -0.5922319144 | -0.4657139218 |
| C  | -1.2029269248 | 2.6470358462  | 0.6850723697  |
| H  | -0.6551520250 | 3.4455886184  | 1.1983675101  |
| H  | -1.7421453184 | 3.1082535274  | -0.1522877420 |
| H  | -1.9309052002 | 2.2114163312  | 1.3703557078  |
| C  | -1.1977167396 | -0.2329448017 | -1.4920659743 |
| N  | -1.8952002687 | -0.3612278081 | -2.4116845379 |

[CNCI2V-CHMe] BLW E = -1163.072936

|    |               |               |               |
|----|---------------|---------------|---------------|
| V  | -0.0172437202 | -0.1102602503 | -0.0903453261 |
| C  | -0.0256546090 | 1.6334431006  | 0.3146334573  |
| H  | 0.9563351574  | 2.1027188546  | 0.3908210465  |
| CL | -0.2537474102 | -1.0118628140 | 1.8690077966  |
| CL | 1.8711670883  | -0.3166119919 | -1.1421501054 |
| C  | -1.2378600617 | 2.3886120596  | 0.6817362482  |
| H  | -1.1256862223 | 2.7829709327  | 1.7001220683  |
| H  | -1.3506070930 | 3.2497782647  | 0.0099221491  |
| H  | -2.1549683355 | 1.7992754707  | 0.6294745458  |
| C  | -1.5949318593 | -0.1535583966 | -1.3000834650 |
| N  | -2.5098414637 | -0.2091203478 | -2.0105131250 |

**4-Ta DFT E = -885.92295**

|    |               |               |               |
|----|---------------|---------------|---------------|
| TA | -0.2975150006 | -0.0574720859 | 0.1028575819  |
| C  | -0.2436929231 | 1.8469079495  | 0.0964288904  |
| H  | 0.8790691630  | 1.7513380890  | 0.0909728383  |
| C  | -0.7605758349 | 3.2426744313  | 0.0789558171  |
| H  | -0.4250096553 | 3.8187165711  | 0.9500308792  |
| H  | -0.4376446145 | 3.7892318093  | -0.8156836224 |
| H  | -1.8540381775 | 3.2462774420  | 0.0864454776  |
| C  | 0.9339123005  | -0.6413182149 | 1.8007136858  |
| H  | 1.8658707127  | -0.0707119369 | 1.8859329360  |
| H  | 0.3258275382  | -0.3225097510 | 2.6636125505  |
| C  | 0.8182683111  | -0.6175787394 | -1.6817736429 |
| H  | 1.8595217255  | -0.2805313118 | -1.5651542037 |
| H  | 0.4266976476  | -0.0383393475 | -2.5284247950 |
| C  | 0.7659675690  | -2.1197488076 | -1.9844713979 |
| H  | -0.2586102909 | -2.4570476850 | -2.1729515304 |

|    |               |               |               |
|----|---------------|---------------|---------------|
| H  | 1.3553478076  | -2.3794097200 | -2.8716726455 |
| H  | 1.1572343473  | -2.7246146818 | -1.1592536345 |
| C  | 1.2058505540  | -2.1483031483 | 1.8714469057  |
| H  | 1.9041482133  | -2.4692773540 | 1.0919484278  |
| H  | 1.6488469791  | -2.4383227251 | 2.8315989311  |
| H  | 0.2925815693  | -2.7439528114 | 1.7545694107  |
| O  | -2.0810496562 | -0.7586071480 | 0.1783702336  |
| SI | -3.6535827709 | -1.1145485915 | -0.0633622447 |
| O  | -3.8114758408 | -2.6860817727 | 0.3591739949  |
| H  | -4.6245798375 | -3.1167554290 | 0.0956858241  |
| O  | -4.1365733074 | -0.9451502249 | -1.6192021199 |
| H  | -4.4698695021 | -0.0819205653 | -1.8648189265 |
| O  | -4.5926938759 | -0.0763060348 | 0.8008307998  |
| H  | -4.3049098406 | 0.1198303648  | 1.6925478490  |

**4-Ta BLW E = -885.8779238**

|    |               |               |               |
|----|---------------|---------------|---------------|
| TA | -0.1953978058 | -0.2664552162 | 0.0604778963  |
| C  | -0.1152026317 | 1.6741500420  | 0.1488286213  |
| H  | 0.9236077182  | 2.0247032042  | 0.1574033735  |
| C  | -1.1701699652 | 2.7334412488  | 0.2042276179  |
| H  | -1.0611198079 | 3.3635963735  | 1.0965409887  |
| H  | -1.1096335455 | 3.4038749632  | -0.6626279249 |
| H  | -2.1804724030 | 2.3142589274  | 0.2213466130  |
| C  | 0.9834968648  | -0.7717158702 | 1.8306029042  |
| H  | 1.9331720155  | -0.2179828630 | 1.7819910383  |
| H  | 0.4776442414  | -0.3862724754 | 2.7241469653  |
| C  | 0.8974022286  | -0.6206269295 | -1.7945414049 |
| H  | 1.8196163024  | -0.0250995357 | -1.8291266927 |
| H  | 0.2629672111  | -0.2028020799 | -2.5891318384 |
| C  | 1.2000668396  | -2.0992460297 | -2.0622029406 |
| H  | 0.2938593228  | -2.7162662358 | -2.0732736080 |
| H  | 1.6859575957  | -2.2443167020 | -3.0343533530 |
| H  | 1.8753768993  | -2.5265532528 | -1.3125309047 |
| C  | 1.2496351276  | -2.2771252375 | 1.9540129633  |
| H  | 1.7732379721  | -2.6836349046 | 1.0802357734  |
| H  | 1.8773869903  | -2.5104322523 | 2.8221243601  |
| H  | 0.3233403380  | -2.8502210120 | 2.0707605929  |
| O  | -2.1159159083 | -0.6848381760 | 0.0778056909  |
| SI | -3.7221978727 | -0.7831013184 | -0.0941335168 |
| O  | -4.1445516757 | -2.2393363846 | 0.5253522128  |
| H  | -5.0309902463 | -2.5394895204 | 0.3249056867  |
| O  | -4.2410026385 | -0.7312024300 | -1.6498580022 |
| H  | -4.4359364634 | 0.1387155134  | -1.9980823670 |

|   |               |              |              |
|---|---------------|--------------|--------------|
| O | -4.4629913980 | 0.4995019642 | 0.6368128155 |
| H | -4.1038619955 | 0.7509447592 | 1.4876407089 |

**5-W DFT E = -1103.034148**

|    |               |               |               |
|----|---------------|---------------|---------------|
| W  | 0.0321612073  | -0.0646191070 | 0.0752926860  |
| C  | -0.0894289939 | 1.8188338353  | 0.0666864626  |
| H  | 0.9414411525  | 2.1509851108  | -0.1696796704 |
| C  | -5.0827214182 | -1.2325130153 | 1.3510122266  |
| C  | -3.7737663389 | -0.7759475901 | 1.3588987234  |
| C  | -2.9270605897 | -1.0412807514 | 0.2734874528  |
| C  | -3.4226360773 | -1.7741873801 | -0.8135988582 |
| C  | -4.7347098662 | -2.2219380926 | -0.8130755581 |
| C  | -5.5705487787 | -1.9546327460 | 0.2666706996  |
| N  | -1.6363747172 | -0.5728995813 | 0.2895887506  |
| O  | 1.2853382345  | -0.7465704156 | -1.2396783338 |
| SI | 2.6731096677  | -0.4980908485 | -2.0565391119 |
| O  | 2.4574117847  | -0.8179043070 | -3.6527454297 |
| O  | 3.9081501666  | -1.4526371518 | -1.5587055934 |
| O  | 3.0988607101  | 1.0512232549  | -1.7176996549 |
| C  | 0.8728201400  | -0.3529214084 | 2.0188589301  |
| C  | 2.1769919646  | 0.4082642786  | 2.2478080591  |
| C  | -1.1010904005 | 2.9047933739  | 0.2045594666  |
| H  | 4.0015425553  | 1.3065579312  | -1.9080252319 |
| H  | 1.6299221905  | -0.5359123641 | -4.0425078653 |
| H  | 3.9533664935  | -2.3188071547 | -1.9633866042 |
| H  | 0.1431452515  | -0.1119499307 | 2.7960021892  |
| H  | 1.0454489704  | -1.4406138163 | 2.0825356792  |
| H  | -5.1083711764 | -2.7849886369 | -1.6622873943 |
| H  | -6.5962271697 | -2.3073744881 | 0.2628947199  |
| H  | -5.7281790785 | -1.0203760350 | 2.1973164648  |
| H  | -3.3815273578 | -0.2086354820 | 2.1955995109  |
| H  | -2.7643022395 | -1.9802218120 | -1.6509111507 |
| H  | -2.0940373348 | 2.4965614952  | 0.4032233430  |
| H  | -0.8406363421 | 3.5819180433  | 1.0278963597  |
| H  | -1.1546780918 | 3.5171366860  | -0.7039135810 |
| H  | 2.6729276808  | 0.0855933452  | 3.1714143986  |
| H  | 2.8975775830  | 0.2613290316  | 1.4356606252  |
| H  | 1.9886804203  | 1.4827698028  | 2.3248124967  |

**5-W BLW E = -1102.925524**

|   |              |               |              |
|---|--------------|---------------|--------------|
| W | 0.2077865667 | -0.2664093331 | 0.2281145790 |
| C | 0.0791469056 | 1.6477603450  | 0.0947850617 |

|    |               |               |               |
|----|---------------|---------------|---------------|
| H  | 1.0510502507  | 2.1428529546  | 0.0364429067  |
| C  | -5.0286224751 | -0.4413482804 | 1.2212924047  |
| C  | -3.6597121349 | -0.2287868531 | 1.1410949228  |
| C  | -2.8456470000 | -1.1020223623 | 0.4008784137  |
| C  | -3.4564003057 | -2.1826141494 | -0.2629337412 |
| C  | -4.8229142526 | -2.3852601143 | -0.1806409228 |
| C  | -5.6169512193 | -1.5175213456 | 0.5644367143  |
| N  | -1.4830351378 | -1.0098427949 | 0.3638519146  |
| O  | 1.6519158481  | -0.7667570996 | -1.0201156706 |
| SI | 2.8049312471  | -0.0311017582 | -1.9111557464 |
| O  | 2.3076213311  | 0.1320841658  | -3.4684982751 |
| O  | 4.2297852950  | -0.8317393811 | -1.9577618781 |
| O  | 3.0815853313  | 1.3965393077  | -1.1373159484 |
| C  | 0.9437879881  | -0.3479601066 | 2.2301990996  |
| C  | 2.0283151643  | 0.6735605728  | 2.5623732487  |
| C  | -1.1266011455 | 2.5230550455  | 0.0050608377  |
| H  | 3.8409602416  | 1.9000296487  | -1.4309002517 |
| H  | 1.3744708960  | 0.2915561133  | -3.6097814193 |
| H  | 4.3093061763  | -1.5142231662 | -2.6239922302 |
| H  | 0.1089190201  | -0.2752915106 | 2.9321443258  |
| H  | 1.3351029899  | -1.3753146423 | 2.3249634500  |
| H  | -5.2715209495 | -3.2340542595 | -0.6873876417 |
| H  | -6.6859228193 | -1.6858731552 | 0.6400160877  |
| H  | -5.6422771892 | 0.2322146882  | 1.8109562340  |
| H  | -3.1933056748 | 0.5930857131  | 1.6739704725  |
| H  | -2.8190095943 | -2.8625522947 | -0.8178546087 |
| H  | -2.0669270159 | 1.9679441109  | -0.0154274997 |
| H  | -1.1627341865 | 3.2177169309  | 0.8542284873  |
| H  | -1.0797386739 | 3.1412390094  | -0.9003338730 |
| H  | 2.5075450718  | 0.4461015026  | 3.5218561340  |
| H  | 2.8203215595  | 0.7069011188  | 1.8063725704  |
| H  | 1.6019409326  | 1.6785135688  | 2.6289251412  |

6-Re DFT E = -905.9722463

|    |               |               |               |
|----|---------------|---------------|---------------|
| RE | 0.1074748662  | 0.1375920971  | -0.1314443860 |
| C  | 0.0685269392  | 1.9935899755  | 0.1002252650  |
| H  | -0.9468400210 | 2.3288150499  | -0.1942981771 |
| C  | -0.8214773786 | -0.4878028178 | 1.6556914149  |
| C  | -2.2644355525 | 0.0072528173  | 1.7246972128  |
| C  | 1.7569202172  | -0.1540025495 | 0.2846530396  |
| C  | 3.1755639748  | -0.4305183643 | 0.5115635955  |
| O  | -0.6081177834 | -0.5810153057 | -1.7995824088 |
| SI | -0.2804901388 | -1.4737332002 | -3.1166400397 |

|   |               |               |               |
|---|---------------|---------------|---------------|
| O | -1.1039300381 | -2.8797175623 | -2.9323220504 |
| C | 1.0003924799  | 3.1022966864  | 0.4442138831  |
| O | -0.6937699950 | -0.6379845914 | -4.4782529786 |
| O | 1.3068363882  | -1.8511024954 | -3.3243283301 |
| H | -2.8072139752 | -0.1448401676 | 0.7833807410  |
| H | -2.3008237838 | 1.0754005066  | 1.9580028594  |
| H | -2.8315089755 | -0.5251754975 | 2.4979298059  |
| H | 1.9939193213  | 2.7221462998  | 0.6886825854  |
| H | 1.0908800887  | 3.8249149130  | -0.3766690525 |
| H | 0.6279334609  | 3.6591573633  | 1.3137118352  |
| H | -0.8552613710 | -3.5838410466 | -3.5314272139 |
| H | -1.5189516657 | -0.1553947184 | -4.4258834235 |
| H | 1.8191686875  | -1.1997600569 | -3.8040874630 |
| H | -0.2774887266 | -0.2311102723 | 2.5649865544  |
| H | -0.7962034650 | -1.5874693510 | 1.5732599365  |
| H | 3.5544206767  | -1.1716107558 | -0.1995087296 |
| H | 3.3344149555  | -0.8072628643 | 1.5277034034  |
| H | 3.7638503390  | 0.4867080536  | 0.3974442560  |

6-Re BLW E = -905.803857

|    |               |               |               |
|----|---------------|---------------|---------------|
| RE | -0.1370776040 | -0.3964495975 | 0.1318329254  |
| C  | -0.1422743845 | 1.5068531934  | -0.0013424894 |
| H  | -1.1764066624 | 1.8629843073  | -0.0671246876 |
| C  | -1.2431410565 | -0.5103923259 | 1.9641902039  |
| C  | -2.6174647839 | 0.1408127959  | 1.9096839652  |
| C  | 1.3549003591  | -0.9034367414 | 1.0827419486  |
| C  | 2.4633416663  | -0.3068836871 | 1.8403993363  |
| O  | -0.6579959632 | -1.4496750110 | -1.4636838087 |
| SI | -0.4176020276 | -1.7641967548 | -3.0325409684 |
| O  | -0.8328625996 | -3.3342882635 | -3.2545575927 |
| C  | 0.9023534721  | 2.5641521119  | 0.0370946455  |
| O  | -1.2990899409 | -0.7241404110 | -3.9729642379 |
| O  | 1.1297432400  | -1.5500905941 | -3.5494896754 |
| H  | -3.1816984712 | -0.1484518144 | 1.0159025809  |
| H  | -2.5501022027 | 1.2325258083  | 1.9283892487  |
| H  | -3.2189217848 | -0.1656859995 | 2.7739124086  |
| H  | 1.9150417235  | 2.1612155187  | 0.0982791592  |
| H  | 0.8420581670  | 3.1827810811  | -0.8663250485 |
| H  | 0.7465084060  | 3.2353665046  | 0.8910309513  |
| H  | -0.5558608781 | -3.7177966418 | -4.0866344383 |
| H  | -2.2059280092 | -0.5929817054 | -3.6960183133 |
| H  | 1.2914249021  | -0.6960295177 | -3.9509186654 |
| H  | -0.6863765886 | -0.1688062502 | 2.8365574229  |

|   |               |               |              |
|---|---------------|---------------|--------------|
| H | -1.3393927870 | -1.6020765724 | 2.0640378723 |
| H | 3.4182383716  | -0.7660448260 | 1.5591665064 |
| H | 2.2993957517  | -0.5715227707 | 2.8950366296 |
| H | 2.5549795701  | 0.7857622275  | 1.7823744452 |
